# Supplementary material for: Prussian blue as a co-catalyst for enhanced Cr(vi) photocatalytic reduction promoted by titania-based nanoparticles and aerogels
Source: Royal Society of Chemistry journal article supplement (doi:10.1039/d1nj01141c), 2021-01-01
Supplement: d1nj01141c1.pdf [file d1nj01141c1.pdf]

## SUPPORTING INFORMATION

### Prussian blue as a co-catalyst for enhanced Cr(VI) photocatalytic reduction promoted by titania-based nanoparticles and aerogels

Elias Paiva Ferreira-Neto<sup>a,b,\*</sup>, Sajjad Ullah<sup>b,c,d</sup>, Amanda Pasquoto Perissinotto<sup>a</sup>, Fábio S. de Vicente<sup>e</sup>, Sidney José Lima Ribeiro<sup>b</sup>, Marcus Andre Worsley<sup>f</sup>, Ubirajara Pereira Rodrigues-Filho<sup>a\*</sup>

<sup>a</sup>Institute of Chemistry of São Carlos, University of São Paulo, 13560-970, São Carlos, SP, Brazil

<sup>b</sup>Institute of Chemistry, São Paulo State University (UNESP), 14800-060, Araraquara, SP, Brazil

<sup>c</sup>Institute of Chemical Sciences, University of Peshawar, PO Box 25120, Peshawar, Pakistan

<sup>d</sup>Institute of Physics, Federal University of Mato Grosso do Sul, 79070-900, Campo Grande, MS, Brazil

<sup>e</sup>Institute of Geosciences and Exact Sciences, Department of Physics, São Paulo State University (UNESP), 13500-970, Rio Claro, SP, Brazil

<sup>f</sup>Physical and Life Sciences Directorate, Lawrence Livermore National Laboratory, 94550, Livermore, CA, USA

\*Corresponding authors: [elias.p.ferreira@gmail.com](mailto:elias.p.ferreira@gmail.com) (E. P. Ferreira-Neto), [ubirajara@usp.br](mailto:ubirajara@usp.br) (U. P. Rodrigues-Filho)

**Table S1.** Summary of reagent and material samples abbreviations/labels

| Reagent, Method or Sample                                                                   | Abbreviation/Label    |
|---------------------------------------------------------------------------------------------|-----------------------|
| Titanium (IV) dioxide anatase nanoparticles                                                 | TiO <sub>2</sub> -A   |
| Titanium (IV) isopropoxide                                                                  | TiP                   |
| Tetraethylortosilicate                                                                      | TEOS                  |
| 1,5-diphenyl carbazide                                                                      | DPC                   |
| Propylene oxide                                                                             | PO                    |
| N,N-dimethylformamide                                                                       | DMF                   |
| Thermo-Induced Deposition                                                                   | TID                   |
| Epoxide-Assisted Gelation                                                                   | EAG                   |
| SiO <sub>2</sub> @TiO <sub>2</sub> core-shell particles                                     | ST                    |
| SiO <sub>2</sub> @TiO <sub>2</sub> core@shell aerogel prepared by thermo-induced deposition | ST-TID                |
| SiO <sub>2</sub> /TiO <sub>2</sub> composite aerogel prepared by Epoxide-Assisted Gelation  | ST-EAG                |
| TiO <sub>2</sub> aerogel prepared by Epoxide-Assisted Gelation                              | TiO <sub>2</sub> -EAG |
| Prussian Blue Fe <sub>4</sub> [Fe(CN) <sub>6</sub> ] <sub>3</sub>                           | PB                    |

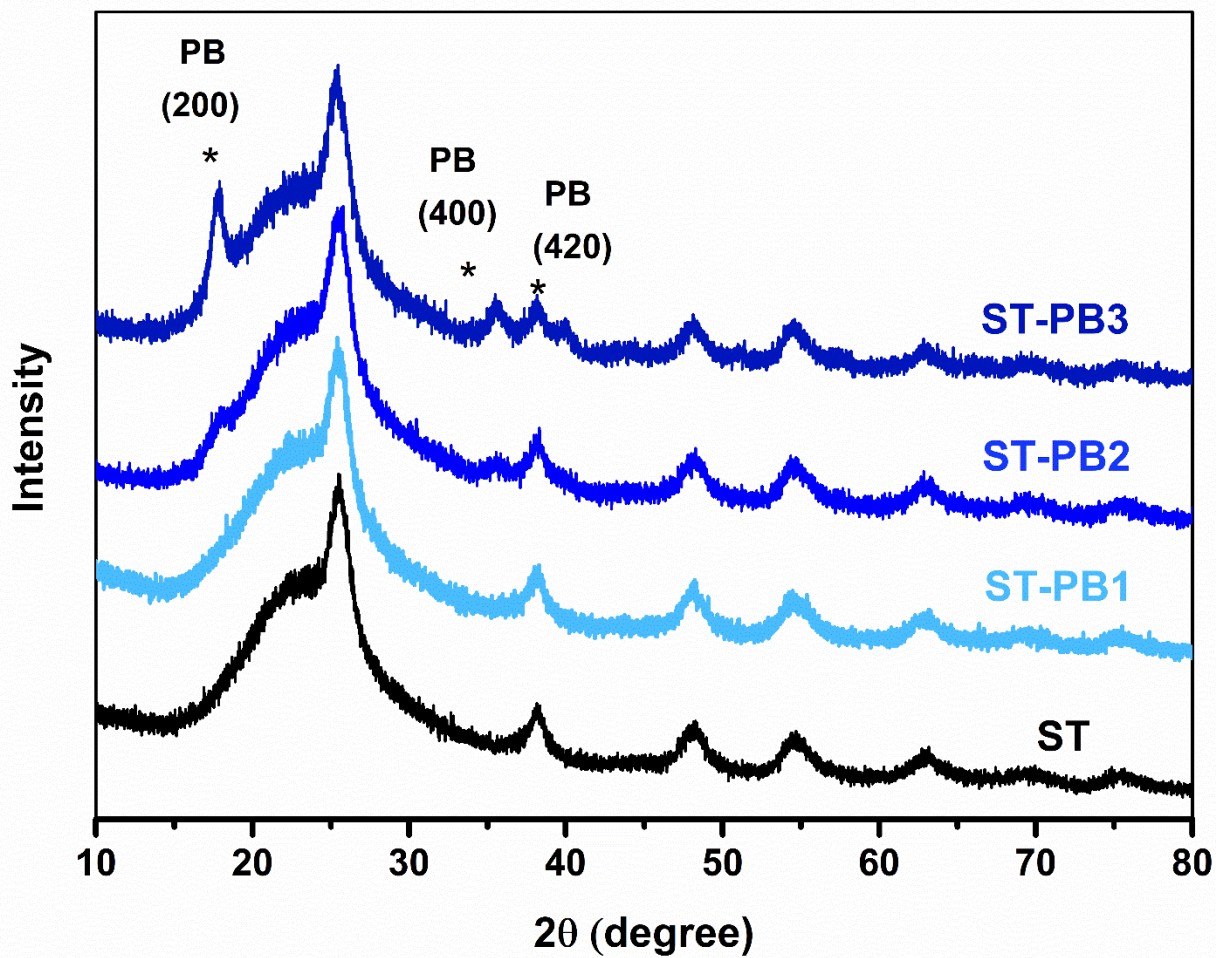

**Figure S1.** X-ray diffractograms of SiO<sub>2</sub>@TiO<sub>2</sub> particles photocatalysts containing different PB loading

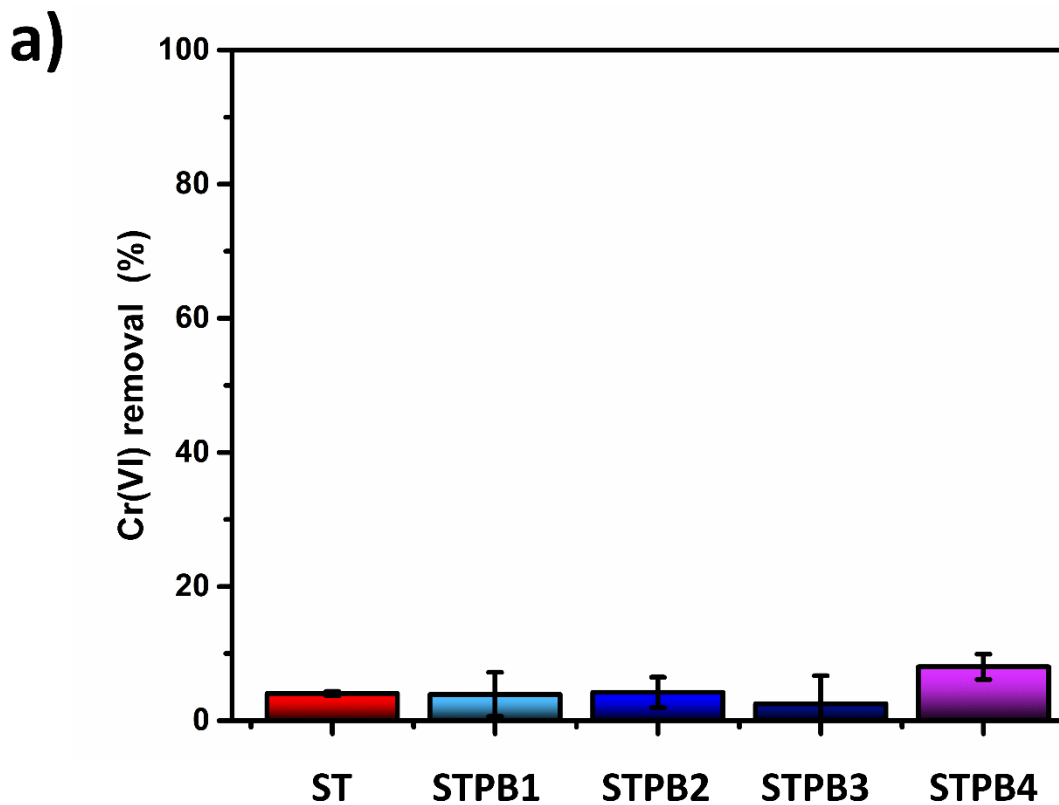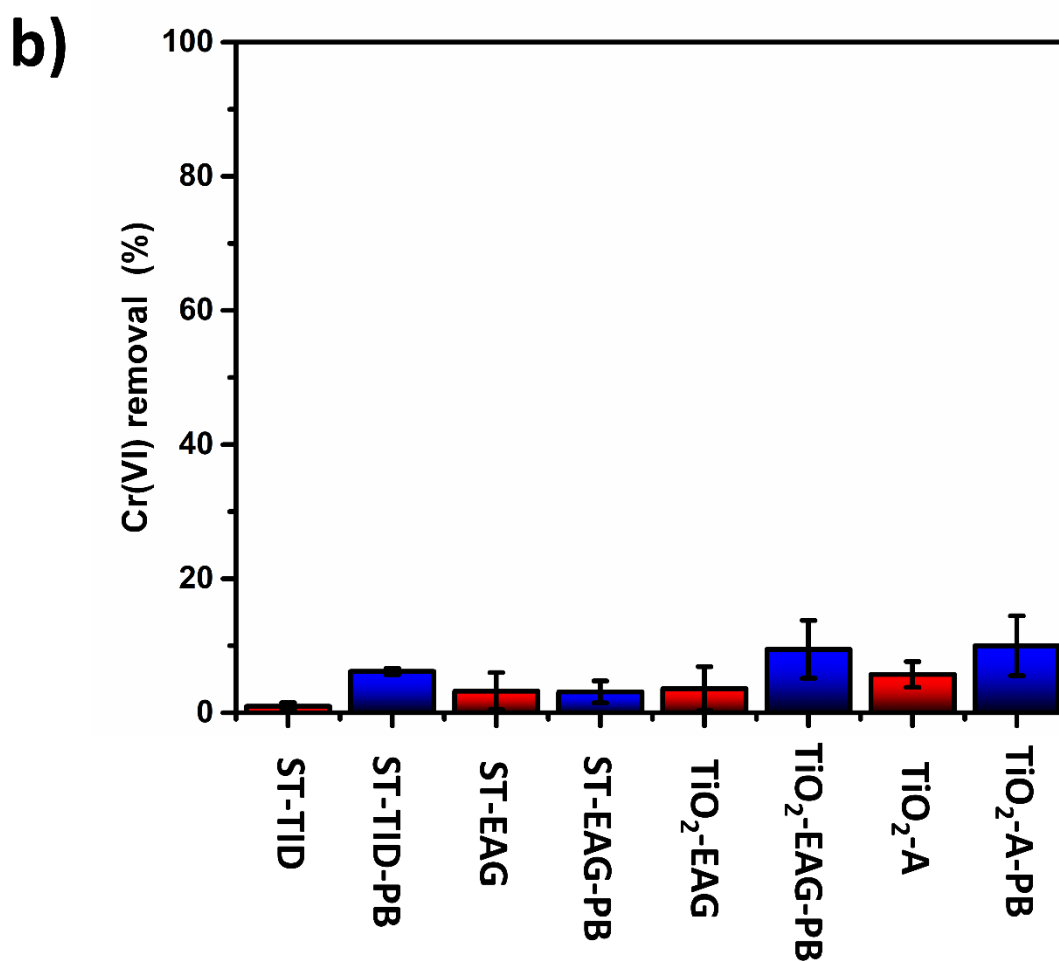

**Figure S2.** Comparison of Cr(VI) removal during initial adsorption step in the 30min kept under magnetic stirring in the dark for: a) unmodified SiO<sub>2</sub>@TiO<sub>2</sub> and SiO<sub>2</sub>@TiO<sub>2</sub> material modified with increasing PB loadings; b) Different unmodified and respective PB-modified TiO<sub>2</sub> and SiO<sub>2</sub>/TiO<sub>2</sub> photocatalyst materials

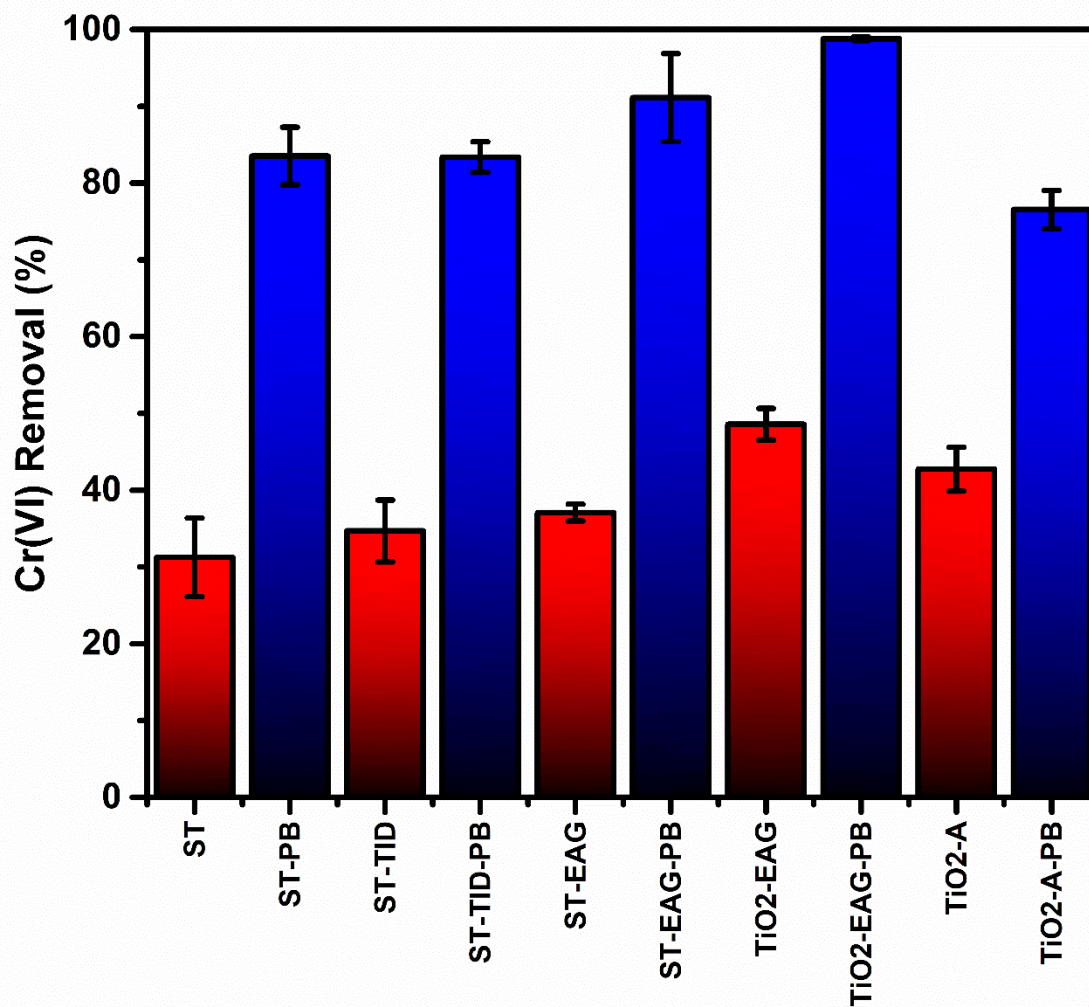

**Figure S3.** Comparison of the Cr(VI) photoreduction efficiency after 60 min irradiation for different titania and silica-titania based photocatalysts with and without PB.

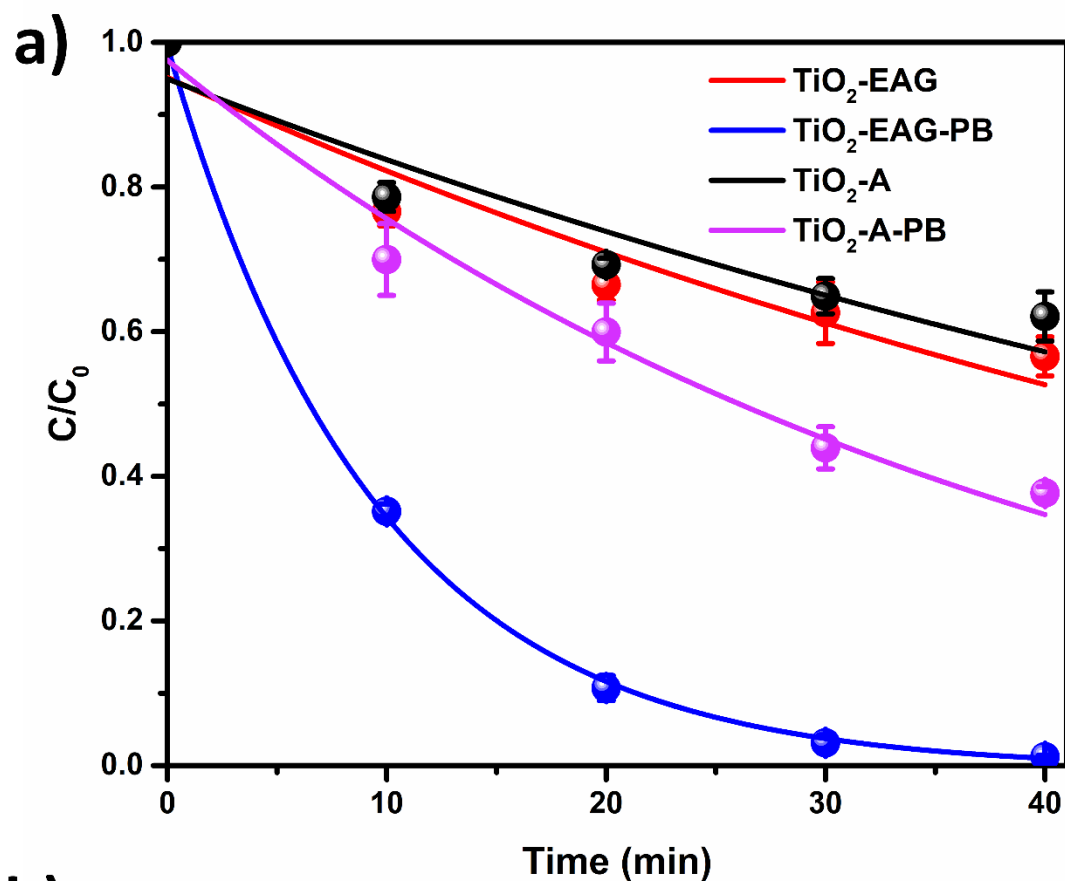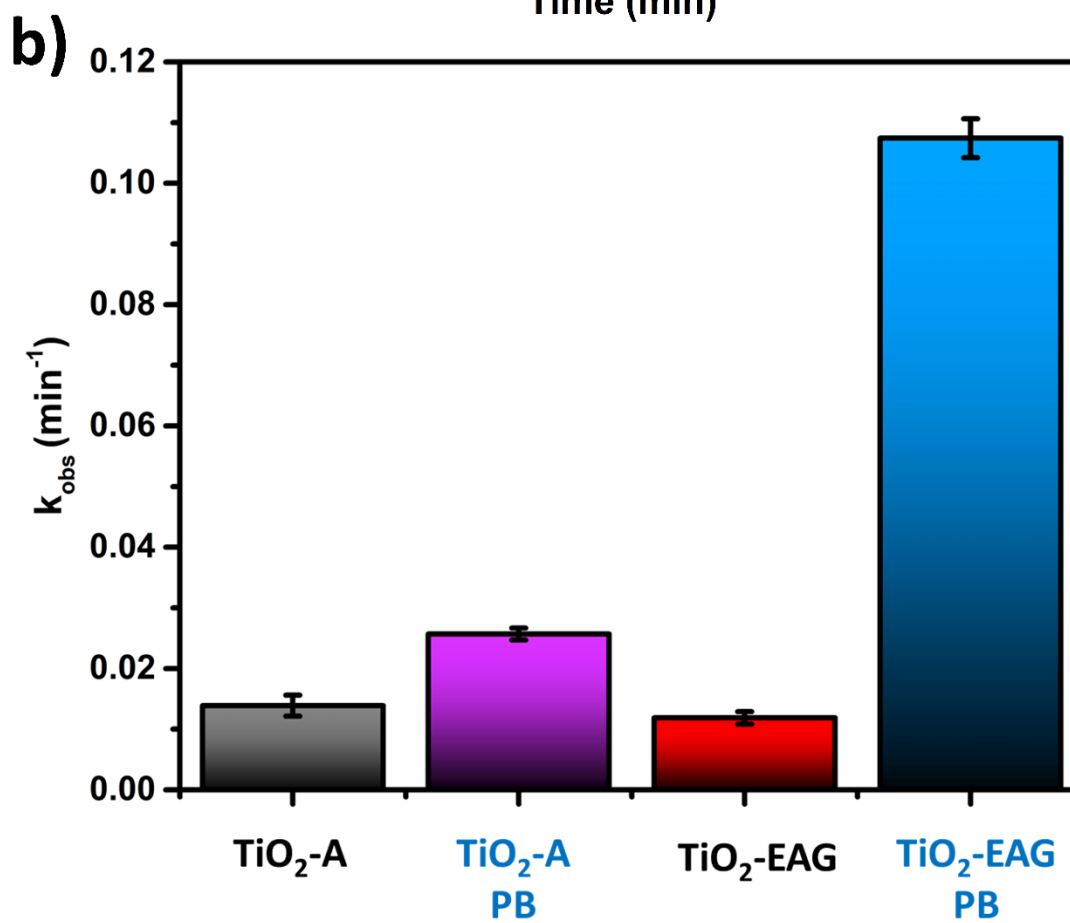

**Figure S4.** a) Fitted kinetic profiles and b) first order kinetic constants of Cr(VI) photocatalytic reduction assays for unmodified and PB modified anatase  $\text{TiO}_2$  ( $\text{TiO}_2\text{-A}$ ) or anatase/rutile  $\text{TiO}_2$  samples ( $\text{TiO}_2\text{-EAG-PB}$ )

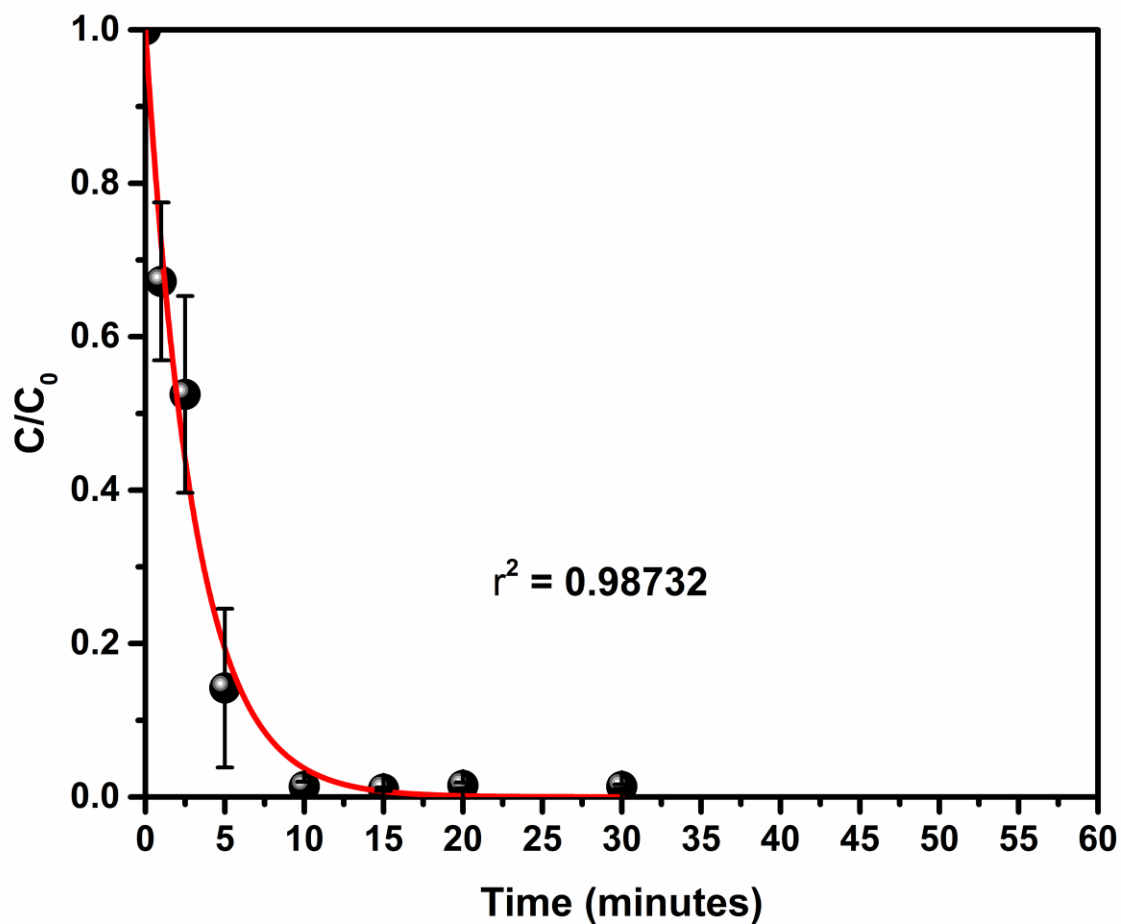

**Figure S5.** a) Fitted first-order kinetic profiles of Cr(VI) photocatalytic reduction experiment for  $\text{TiO}_2$ -EAG-PB sample in acidic media (pH=3) and with higher catalyst dosage ( $1\text{g}\cdot\text{L}^{-1}$ )



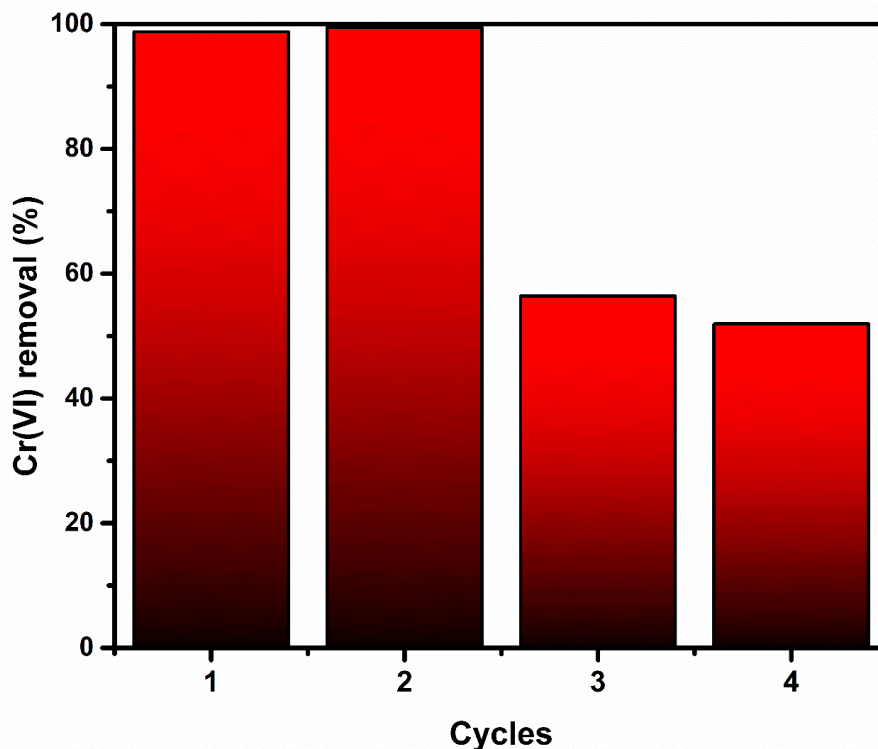

**Figure S6.** Figure S8. Cr(VI) removal under unadjusted pH conditions (pH = 5.6) after repeated photocatalytic cycles using the same recycled photocatalyst ( $\text{TiO}_2\text{-EAG-PB2}$ , catalyst dosage =  $0.5 \text{ g.L}^{-1}$ ). The photocatalyst, after exposure to UV light for 40 min, was recovered by centrifugation at 3500 rpm for 30 min and washed with  $0.5 \text{ mol.L}^{-1} \text{ H}_2\text{SO}_4$  solution before being used in the next photocatalysis cycle.

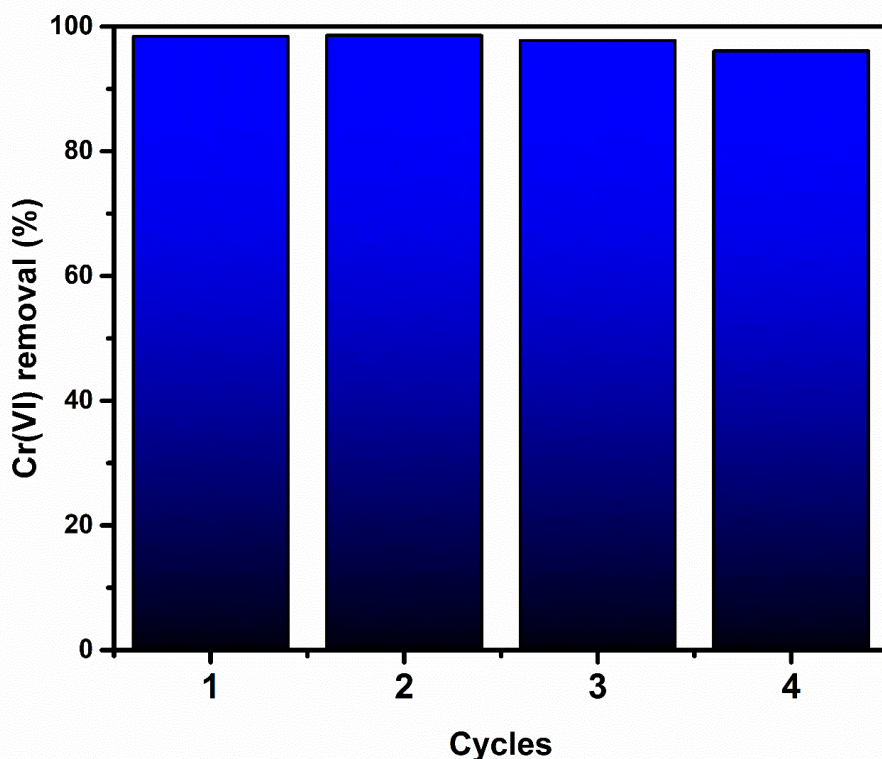

**Figure S7.** Cr(VI) removal under acidic conditions (pH = 3) after repeated photocatalytic cycles using the same recycled photocatalyst ( $\text{TiO}_2\text{-EAG-PB2}$ , catalyst dosage =  $1 \text{ g.L}^{-1}$ ). The photocatalyst, after exposure to UV light for 30 min, was recovered by centrifugation at 3500 rpm for 30 min and washed with  $0.1 \text{ mol.L}^{-1} \text{ HNO}_3$  solution before being used in the next photocatalysis cycle.
